# Supplementary material for: A novel DNA methylation signature is associated with androgen receptor activity and patient prognosis in bone metastatic prostate cancer
Source: PubMed Central journal article supplement (PMC8244194; doi:10.1186/s13148-021-01119-0), 2021-06-30

**Figure S1**

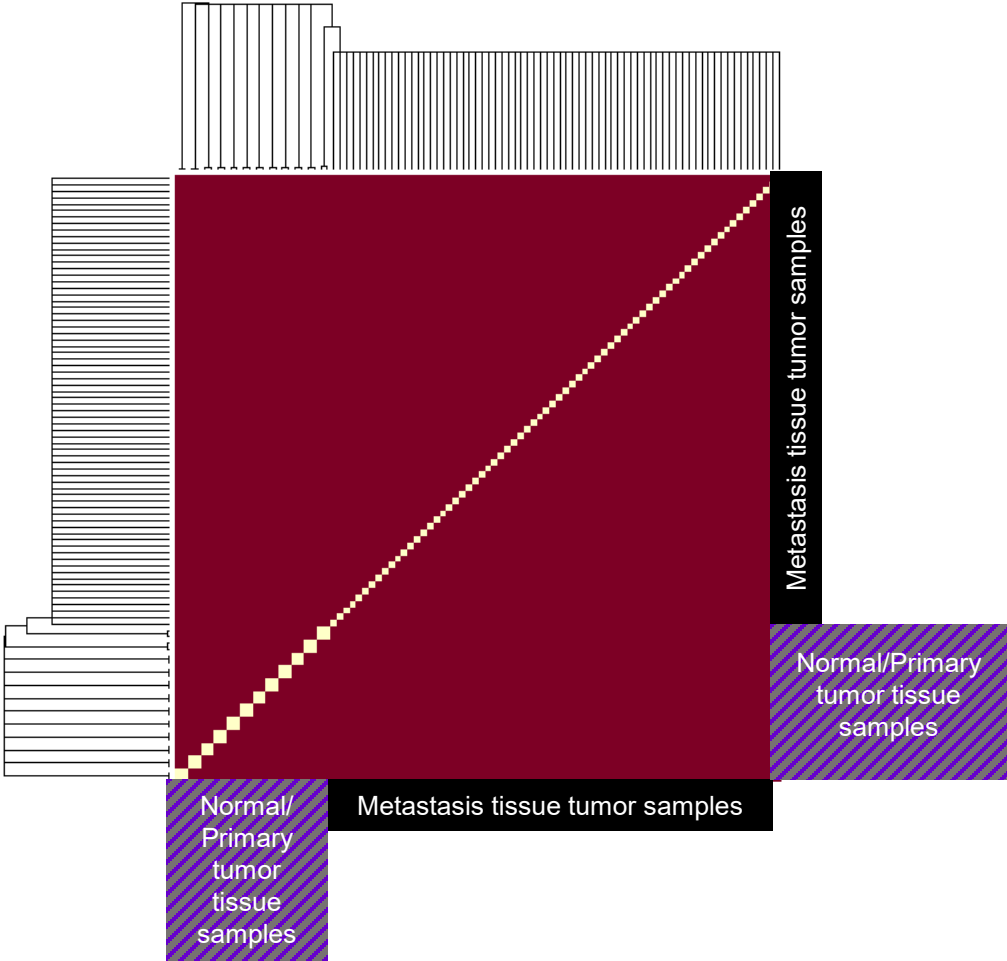

Supplement: 13148_2021_1119_MOESM1_ESM.pdf [file 13148_2021_1119_MOESM1_ESM.pdf]
